# Supplementary material
Source: publisher figshare collection journal article supplement (https://acs.figshare.com/ndownloader/files/15611486)
Supplement: Supplementary file 1 [file 15611486]

## Supporting Information

### Molecular-Level Composition and Acute Toxicity of Photosolubilized Petrogenic Carbon

**Phoebe Zito<sup>a,b,\*</sup>, David C. Podgorski<sup>a,b</sup>, Joshua Johnson<sup>c,g</sup>, Huan Chen<sup>d</sup>, Ryan P. Rodgers<sup>d</sup>, François Guillemette<sup>e</sup>, Anne M. Kellerman<sup>f</sup>, Robert G. M. Spencer<sup>d,f</sup>, and Matthew A. Tarr<sup>a</sup>**

<sup>a</sup>Department of Chemistry, University of New Orleans, 2000 Lakeshore Drive New Orleans, Louisiana 70148, United States

<sup>b</sup>Pontchartrain Institute for Environmental Sciences, University of New Orleans, 2000 Lakeshore Drive New Orleans, Louisiana 70148, United States

<sup>c</sup>Department of Natural Sciences, Gardner-Webb University, 110 South Main Street, Boiling Springs, North Carolina 28017, United States

<sup>d</sup>National High Magnetic Field Laboratory, Florida State University, 1800 East Paul Dirac Drive, Tallahassee, Florida 32310-4005, United States

<sup>e</sup>Research Center for Watershed Aquatic Ecosystem Interactions (RIVE), Department of Environmental Sciences, Université du Québec à Trois-Rivières, Trois-Rivières, Québec, G8Z 4M3 Canada

<sup>f</sup>Department of Earth, Ocean and Atmospheric Science, Florida State University, 600 W College Ave, Tallahassee, Florida 32306-4520, United States

<sup>g</sup>Current Address: Department of Chemistry, Purdue University, 560 Oval Drive, West Lafayette, Indiana 47907-2084, United States

\*Corresponding Author ([pazito@uno.edu](mailto:pazito@uno.edu))

3 Figures

1 Table

|                            | Exposure<br>Period | C1   | C2   | C3   | C4   | C5   | C6   | DOC<br>(mg/L) | HIX | Aliphatic | Unsaturated,<br>Low O | Unsaturated,<br>High O | Condensed<br>Aromatics | Aromatics | SUVA<br>(L mgC <sup>-1</sup> m <sup>-1</sup> ) | Acute<br>Toxicity<br>per Unit<br>Carbon |
|----------------------------|--------------------|------|------|------|------|------|------|---------------|-----|-----------|-----------------------|------------------------|------------------------|-----------|------------------------------------------------|-----------------------------------------|
| Light<br>DOM <sub>HC</sub> | 0                  | 4.6  | 61.8 | 16.1 | 6.9  | 9.6  | 1.0  | 7.2           | 0.2 | 24.5      | 33.2                  | 29.2                   | 1.2                    | 12.0      | 0.6                                            | 51.9                                    |
|                            | 24                 | 14.5 | 13.7 | 41.3 | 17.5 | 9.6  | 3.4  | 59.5          | 1.3 | 16.3      | 49.7                  | 12.1                   | 3.3                    | 18.6      | 2.3                                            | 63.8                                    |
|                            | 48                 | 14.4 | 8.6  | 34.9 | 17.4 | 20.4 | 4.2  | 97.4          | 1.0 | 17.2      | 49.1                  | 11.9                   | 3.5                    | 18.3      | 3.5                                            | 52.3                                    |
|                            | 72                 | 21.2 | 6.3  | 17.6 | 15.9 | 32.0 | 7.0  | 127.4         | 0.9 | 18.4      | 46.6                  | 14.2                   | 3.7                    | 17.1      | 2.8                                            | 33.0                                    |
|                            | 96                 | 22.6 | 4.3  | 10.9 | 13.9 | 40.2 | 8.1  | 189.3         | 0.8 | 17.4      | 46.1                  | 15.5                   | 3.6                    | 17.4      | 1.5                                            | 19.0                                    |
|                            | 120                | 27.6 | 2.1  | 4.0  | 11.5 | 42.7 | 12.0 | 189.9         | 1.0 | 16.5      | 45.3                  | 18.4                   | 3.4                    | 16.3      | 1.9                                            | 13.8                                    |
|                            | 144                | 28.5 | 1.5  | 4.4  | 11.9 | 43.0 | 10.8 | 207.1         | 1.0 | 19.2      | 42.1                  | 20.6                   | 3.2                    | 14.9      | 1.9                                            | 14.5                                    |
|                            | 168                | 30.3 | 0.9  | 1.3  | 10.5 | 47.0 | 9.9  | 207.1         | 1.0 | 19.7      | 42.0                  | 21.0                   | 3.0                    | 14.2      | 1.8                                            | 14.6                                    |
|                            | 192                | 29.5 | 4.5  | 3.9  | 11.2 | 45.5 | 5.4  | 221.7         | 0.8 | 17.7      | 44.4                  | 19.3                   | 3.0                    | 15.7      | 2.9                                            | 12.8                                    |
|                            | 216                | 31.8 | 0.0  | 0.0  | 8.3  | 49.6 | 10.3 | 255.6         | 1.0 | 19.1      | 41.6                  | 23.3                   | 2.6                    | 13.4      | 1.3                                            | 14.2                                    |
|                            | 240                | 32.4 | 0.0  | 0.0  | 7.4  | 50.0 | 10.2 | 234.2         | 1.0 | 19.1      | 42.4                  | 22.9                   | 2.6                    | 12.9      | 1.7                                            | 11.8                                    |
| Heavy<br>DOM <sub>HC</sub> | 0                  | 1.8  | 35.8 | 29.6 | 12.8 | 19.1 | 0.9  | 10.4          | 0.3 | 29.1      | 37.8                  | 22.3                   | 1.7                    | 9.1       | 2.0                                            | 73.1                                    |
|                            | 24                 | 22.6 | 28.1 | 22.1 | 13.7 | 9.9  | 3.7  | 42.5          | 1.0 | 26.6      | 35.8                  | 22.6                   | 3.1                    | 12.0      | 2.2                                            | 52.1                                    |
|                            | 48                 | 25.6 | 11.3 | 33.3 | 12.2 | 9.7  | 7.9  | 76.6          | 2.1 | 24.5      | 37.5                  | 21.3                   | 3.5                    | 13.1      | 3.7                                            | 33.5                                    |
|                            | 72                 | 18.9 | 22.0 | 33.0 | 14.5 | 4.8  | 6.8  | 36.8          | 1.4 | 21.5      | 34.2                  | 23.1                   | 5.5                    | 15.7      | 3.8                                            | 50.4                                    |
|                            | 96                 | 27.5 | 8.7  | 33.6 | 14.8 | 3.5  | 11.9 | 63.5          | 3.3 | 21.1      | 35.1                  | 21.9                   | 5.6                    | 16.3      | 5.3                                            | 29.1                                    |
|                            | 120                | 43.3 | 10.7 | 15.2 | 9.5  | 10.2 | 11.2 | 116.1         | 3.0 | 21.6      | 35.1                  | 21.1                   | 5.6                    | 16.6      | 4.4                                            | 16.4                                    |
|                            | 144                | 46.2 | 6.4  | 19.8 | 9.9  | 3.3  | 14.4 | 139.8         | 5.9 | 21.6      | 35.1                  | 21.1                   | 5.6                    | 16.6      | 5.5                                            | 18.9                                    |
|                            | 168                | 43.8 | 5.2  | 20.5 | 8.8  | 7.1  | 14.6 | 225.5         | 5.0 | 20.8      | 31.0                  | 28.3                   | 5.0                    | 14.9      | 3.2                                            | 0.0                                     |
|                            | 192                | 55.2 | 3.3  | 13.2 | 10.2 | 8.4  | 9.7  | 152.6         | 5.1 | 19.3      | 32.0                  | 28.2                   | 5.0                    | 15.6      | 2.4                                            | 2.6                                     |
|                            | 216                | 44.0 | 4.4  | 19.0 | 10.2 | 7.2  | 15.3 | 242.5         | 5.2 | 19.1      | 29.6                  | 32.4                   | 4.3                    | 14.5      | 2.9                                            | 0.0                                     |
|                            | 240                | 43.5 | 6.8  | 7.4  | 11.1 | 20.4 | 10.8 | 197.8         | 2.4 | 16.7      | 29.2                  | 28.7                   | 7.0                    | 18.4      | 1.9                                            | 0.0                                     |

**Table S1.** Dissolved organic carbon concentrations (DOC), PARAFAC loadings (C1 – C6), HIX values, FT-ICR MS data, SUVA<sub>254</sub>, and acute toxicity per unit carbon results for DOM<sub>HC</sub> produced from light and heavy petroleum.

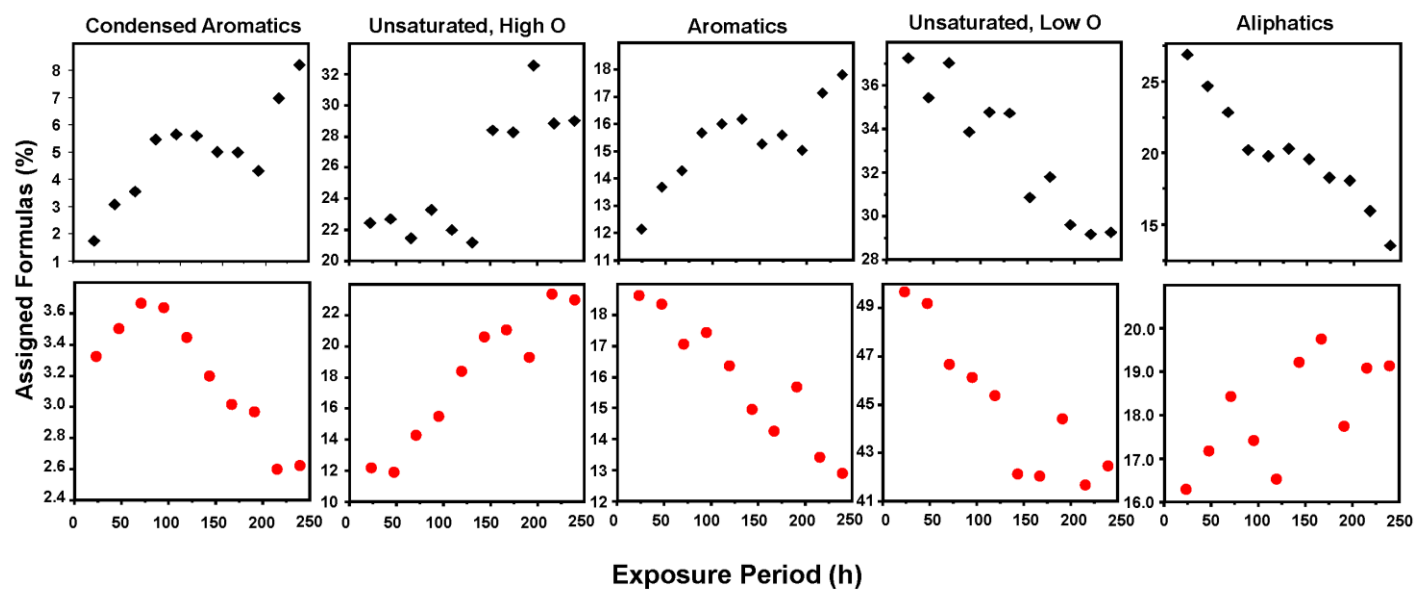

**Figure S1:** FT-ICR MS data versus exposure time for light DOM<sub>HC</sub> (red) and heavy DOM<sub>HC</sub> (black).

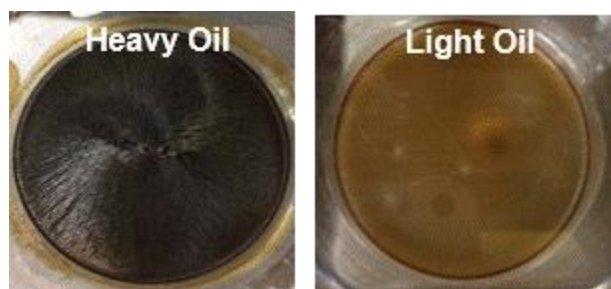

**Figure S2:** Top view of thin oil films after prolonged irradiation for heavy oil (left) and light oil (right) in thermostatically controlled jacketed beakers.

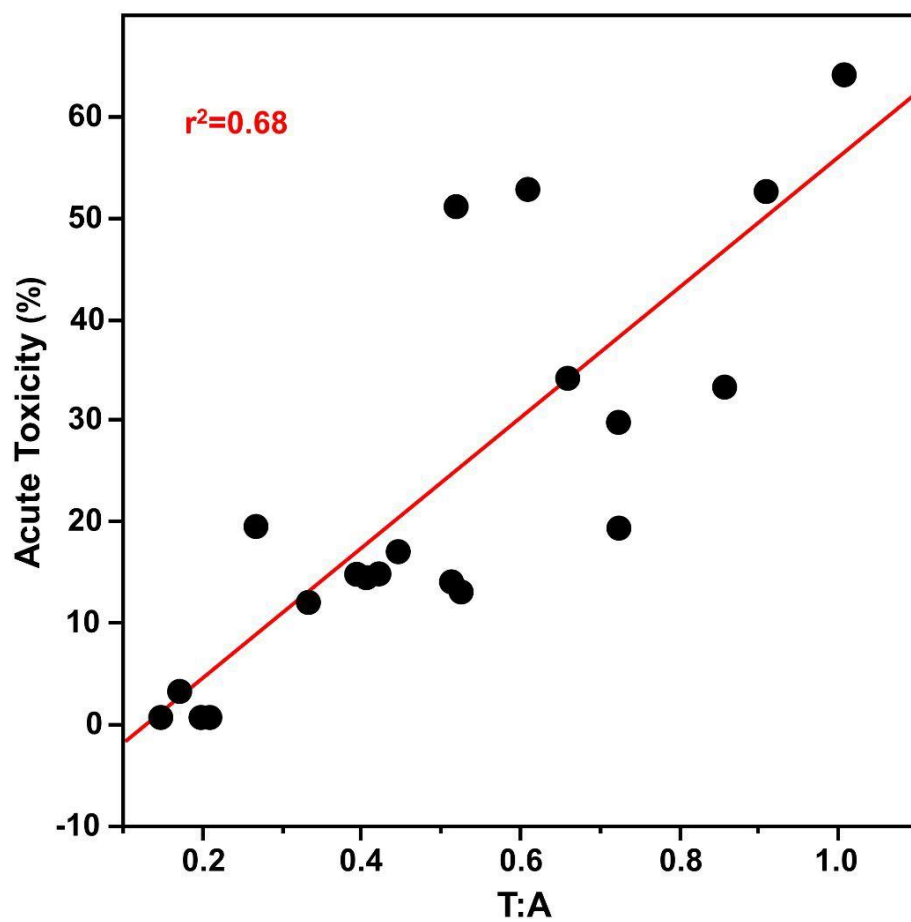

**Figure S3:** Toxicity Index (TI) of raw fluorescence of peaks T and A versus percent acute toxicity per unit carbon.
